# Supplementary material for: Single-cell profiling of human gliomas reveals macrophage ontogeny as a basis for regional differences in macrophage activation in the tumor microenvironment
Source: PubMed Central journal article supplement (PMC5738907; doi:10.1186/s13059-017-1362-4), 2017-12-20

## Supplementary Figures

**Figure S1 – ScRNA-seq data quality control.** (a) Fractions of CD11b-expressing cells (estimated *via* flow-cytometry) in suspensions derived from GBM biopsy SF10360. The top panel shows the residual following negative selection for CD11b using our microbead protocol, and contains only 1.33% CD11b+ cells. The bottom panel shows that 96.3% of cells positively selected using our microbead strategy express CD11b. (b) TSNE clustering of 997 cells from GBM biopsy SF11232. (c) Top panel: TSNE clustering of 14,562 cells from 3 cases (SF11136, SF11147, SF11232). Cells from each tumor are indicated by color. Bottom panel: Here color indicates expression level of canonical marker genes. (d) PCA (top) and TSNE clustering (bottom) of cells from LGG biopsy SF11136 from two independent 10x captures. (e) Distributions of gene expression for canonical markers, across 1,274 single cells from the 12 LGG cases of Venteicher *et al.* [17].

**Figure S2 – Platform-specific PCA of human TAMs.** (a) A PCA of TAMs from C1-based (top) and Smart-Seq2-based (bottom) scRNA-seq in the space of the 237 mouse homologues from Bowman *et al.* The density curves of a Gaussian mixture model are in gray. (b) Top: Multiple factor analysis of individuals (237 marker genes) from two groups (single cells from Smart-Seq2 and C1; variables). Individuals (genes) are represented by dots. Bottom: MFA table contributions for Smart-Seq2 and C1 data tables. (c) The distributions of cells from each platform, across the first principal component of the C1-Smart-seq2 combined PCA.

**Figure S3 – Extended analysis of the proposed signature genes.** (a) Hierarchical clustering of Pearson correlation coefficients, obtained via RNA-seq of LGGs and GBMs from TCGA (n=558 cases). (b) Top panel: PCA of human TAMs (n=3 patients, n=4,039 cells), in the space of genes that are differentially expressed between murine-TAM lineages. Cells positive for *P2RY12*, *SIGLEC8* or *NAV3* are indicated by red dots. Middle panel: Odds ratio (OR) for co-expression with *P2RY12*, based on 4,039 single cells from 3 patients. \*=adjusted p-value <0.05 (Fisher's exact test). Bottom panel: Same as in the middle panel, but for co-expression with *TGFBI*. (c) Gene expression for TAM lineage markers in the combined C1/Smart-seq2 scRNA-seq data. Bar height

represents the mean and whisker length gives a 95% confidence interval. Genes are sorted from highest to lowest absolute log<sub>2</sub> fold-change over sum of variance. (d) Gene expression in IVYGAP for markers of TAM ontogeny. Each column represents a gene, each row annotates expression in RNA-seq of an anatomically defined tumor compartment.

**Figure S4** – *Pathway analysis of genes enriched in blood-derived TAMs relative to microglial TAMs.* Pathways from the KEGG database (<http://www.genome.jp>), that are over-represented in genes up-regulated by blood-derived TAMs.

**Figure S5** – *Over-expression of the signature genes of blood-derived TAMs, but not the signature of microglial TAMs, inversely correlates with survival.* Kaplan-Mayer survival curves were generated based on RNA-seq of LGGs (n=363) and GBMs (n=138) from TCGA.

**Figure S6** – *TAMs from human melanomas simultaneously express M1 and M2 markers in individual cells.* (a) Distributions of canonical M1 and M2 marker genes, in TAMs from human melanomas that express *IL10* (n=108 cells from 7 cases), library prep was based on SMART-Seq2. (b) Flow cytometric analysis of tumor-infiltrating CD204+TLR2+ cells gated on CD11b+, CD49D+ live macrophages (left) and CD11b+, P2RY12+ live microglia (right) from two GBM patient biopsies.

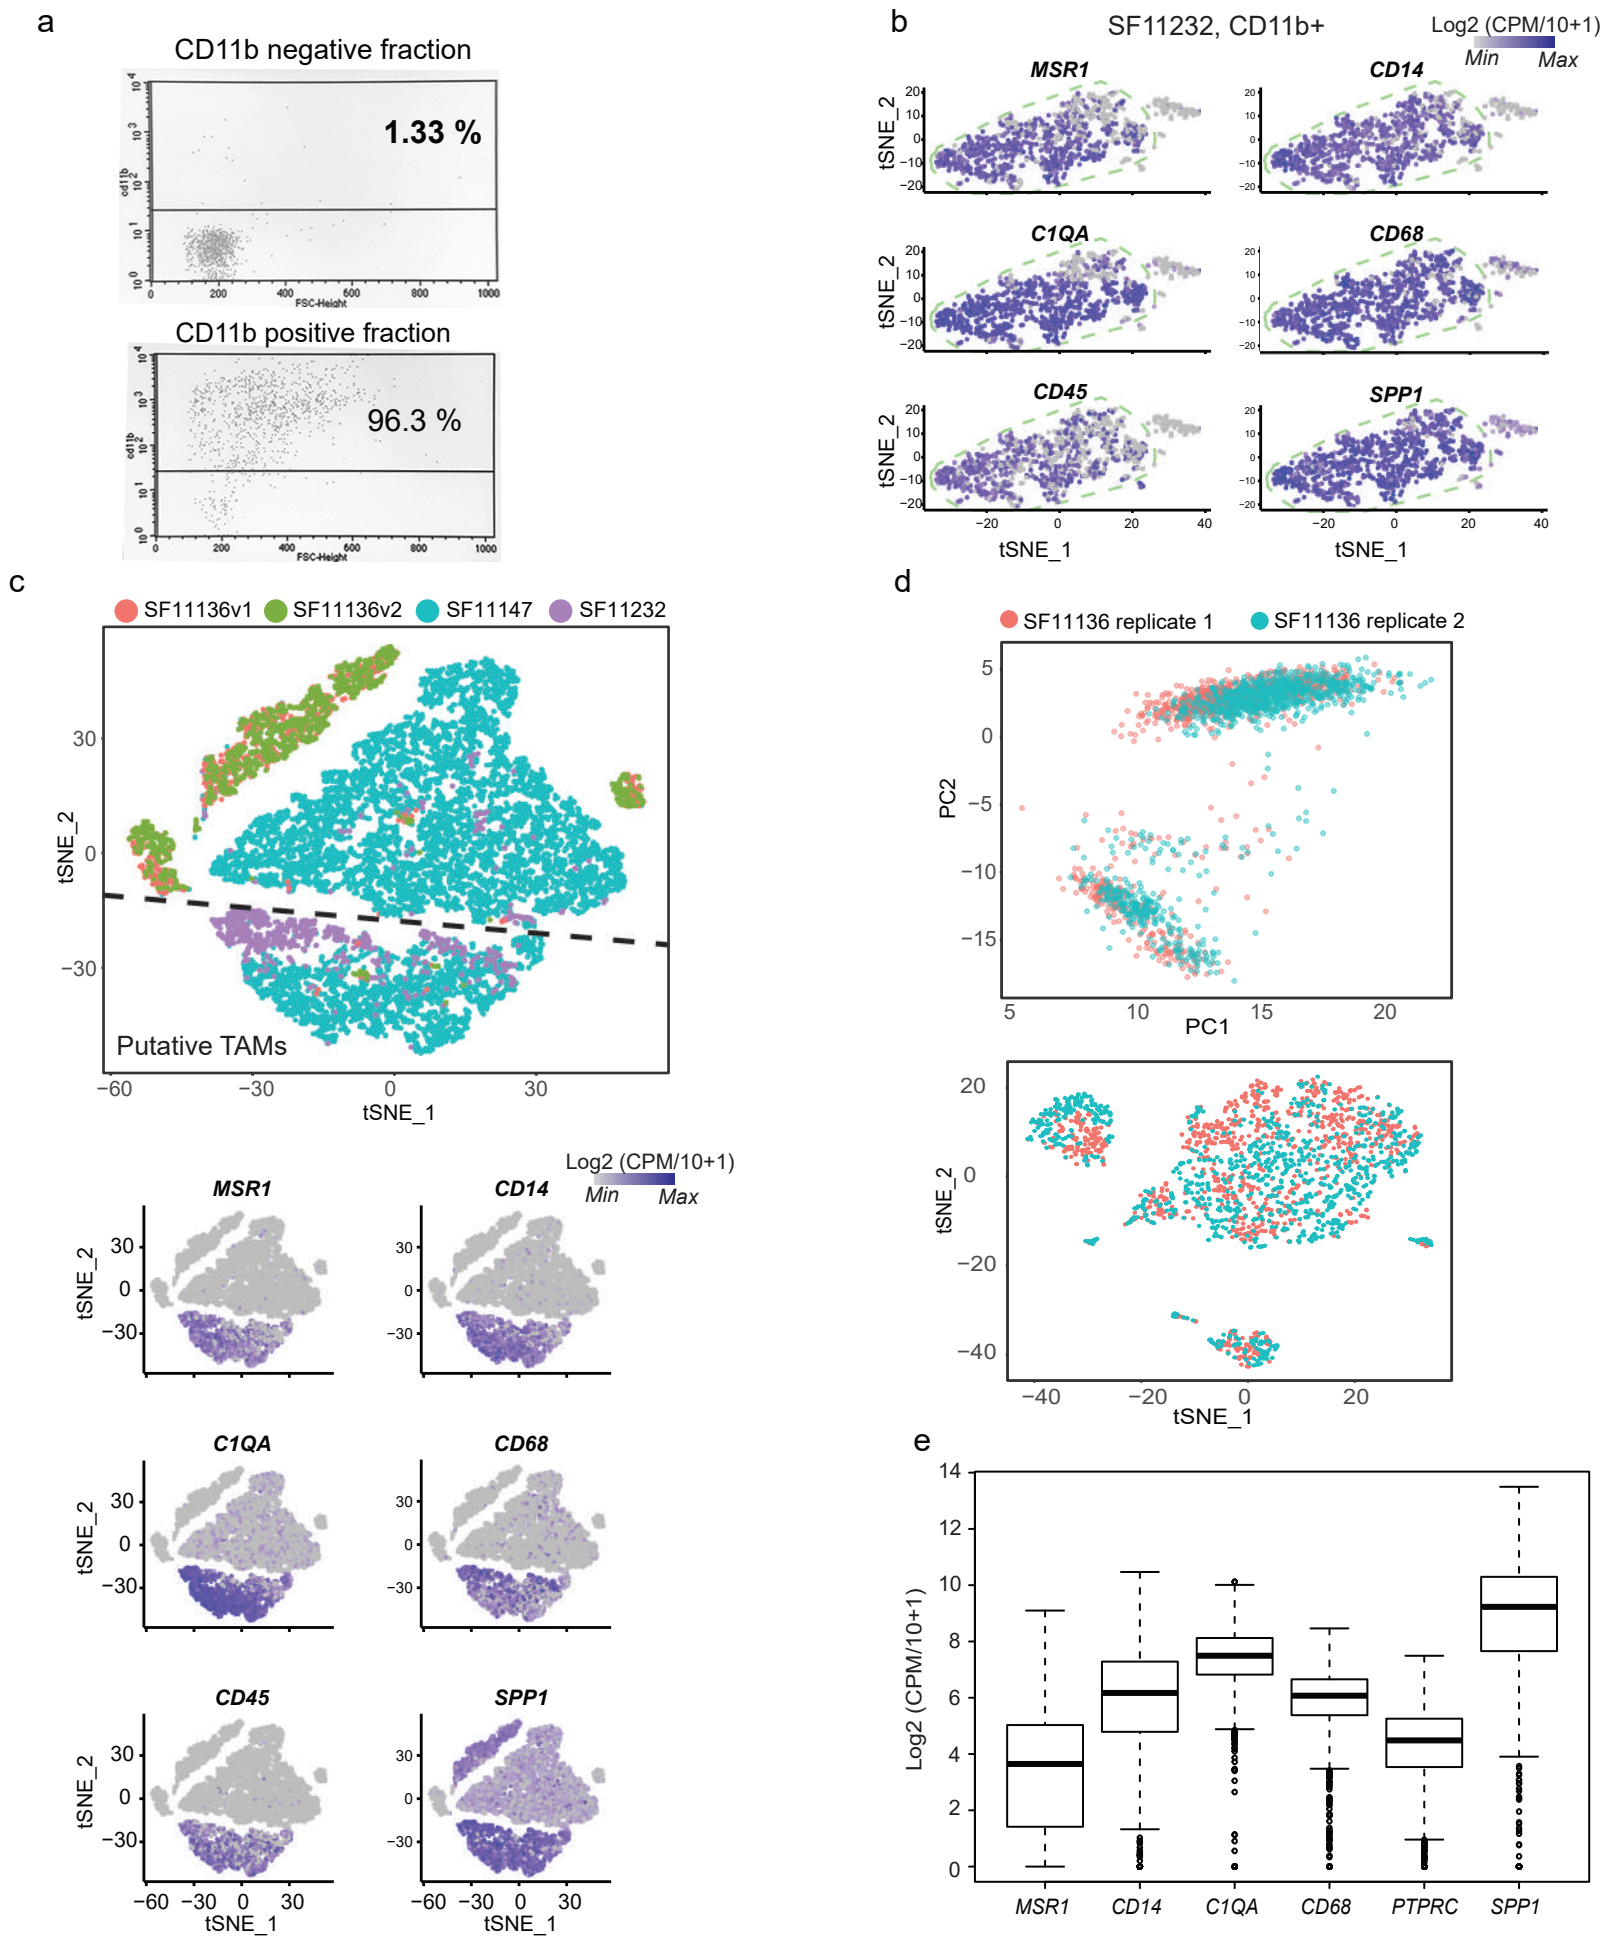

Figure S1

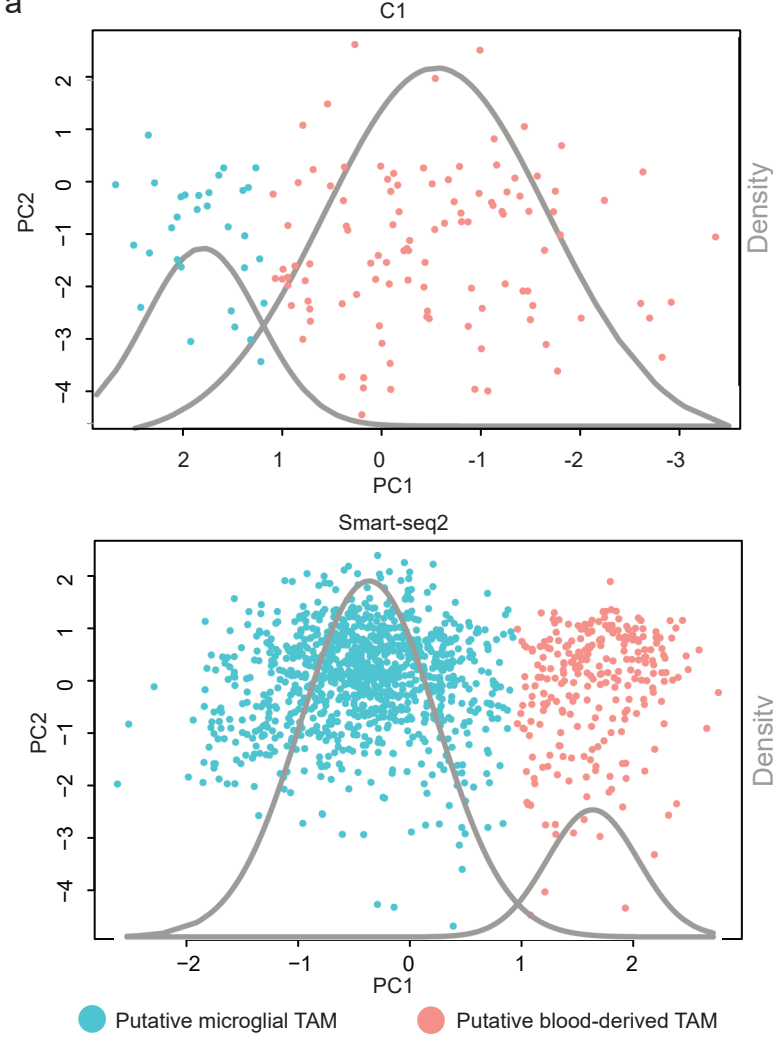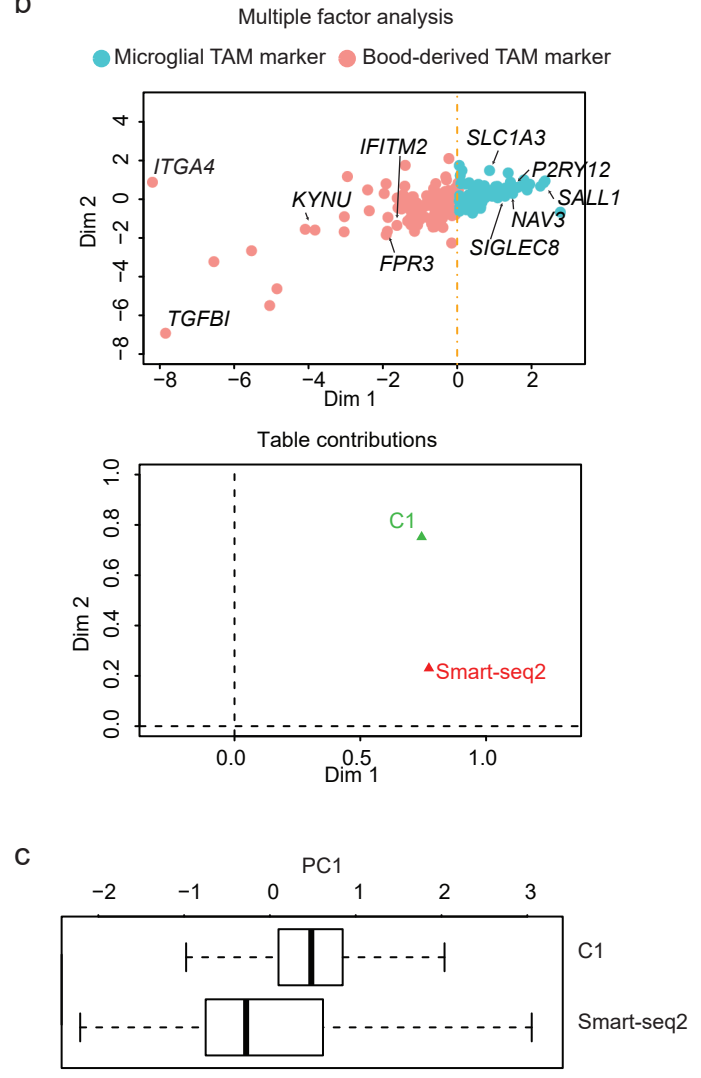

Figure S2

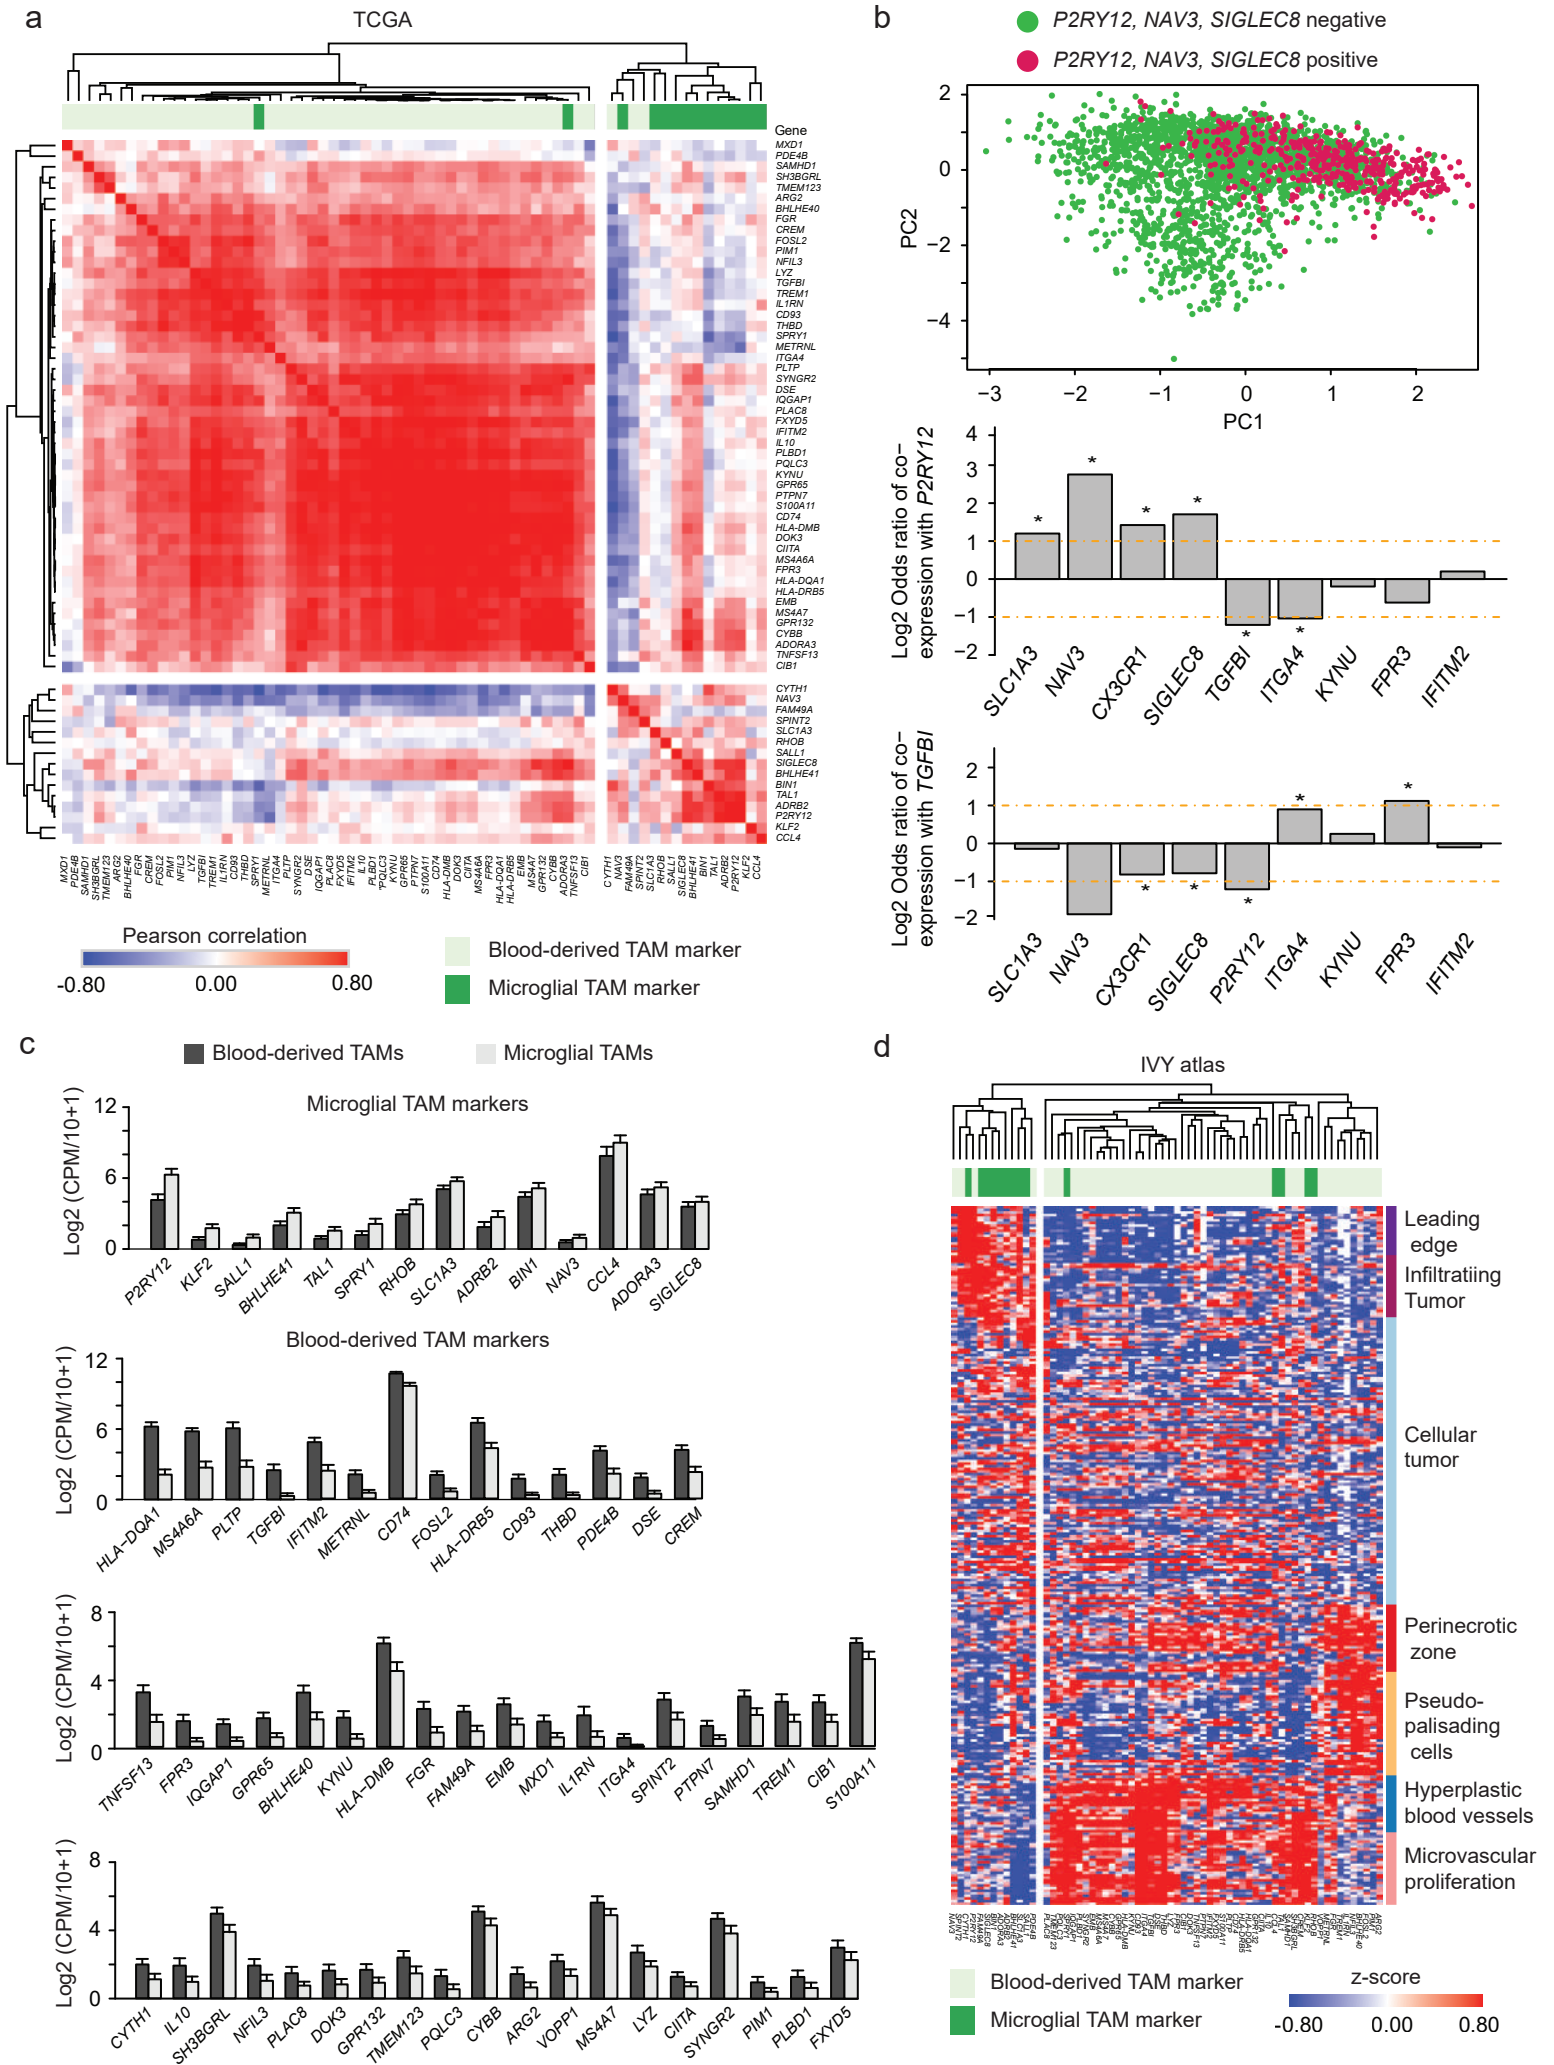

Figure S3



a

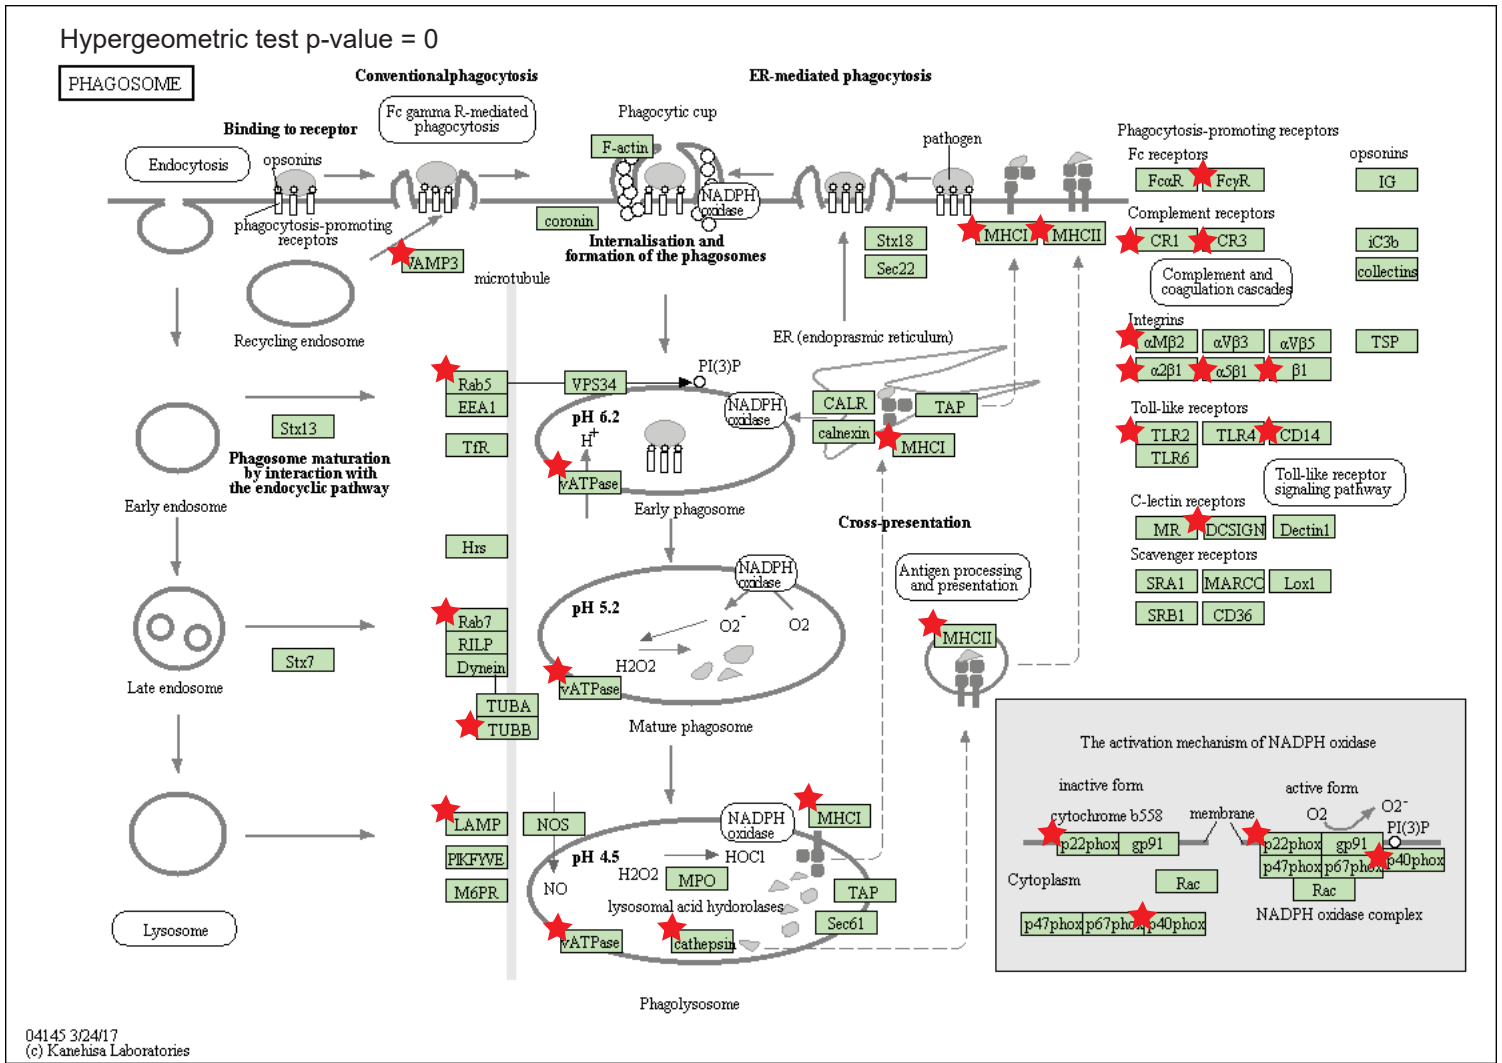

b

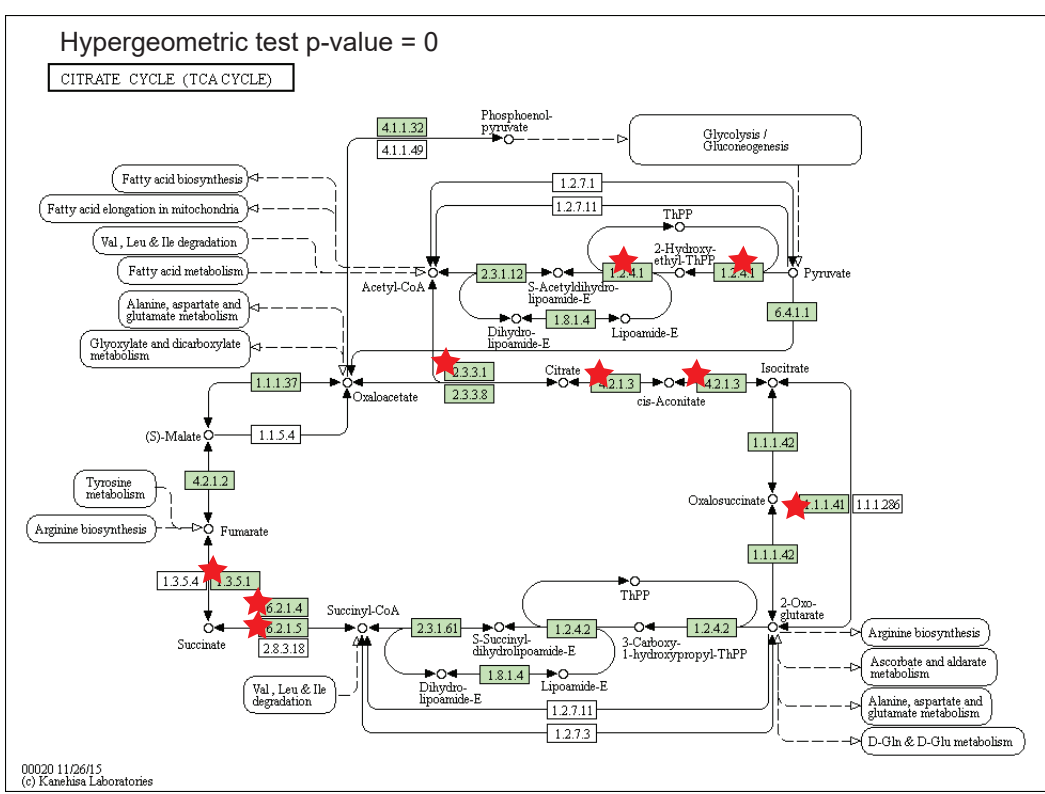

★ - Up regulated in blood-derived TAMs, compared to microglial TAMs, at an adjusted p-value < 1e-3.

Figure S4

c

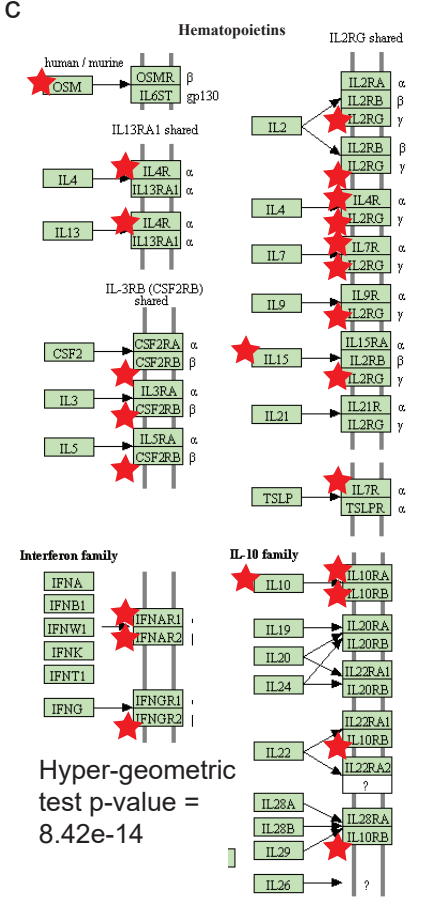

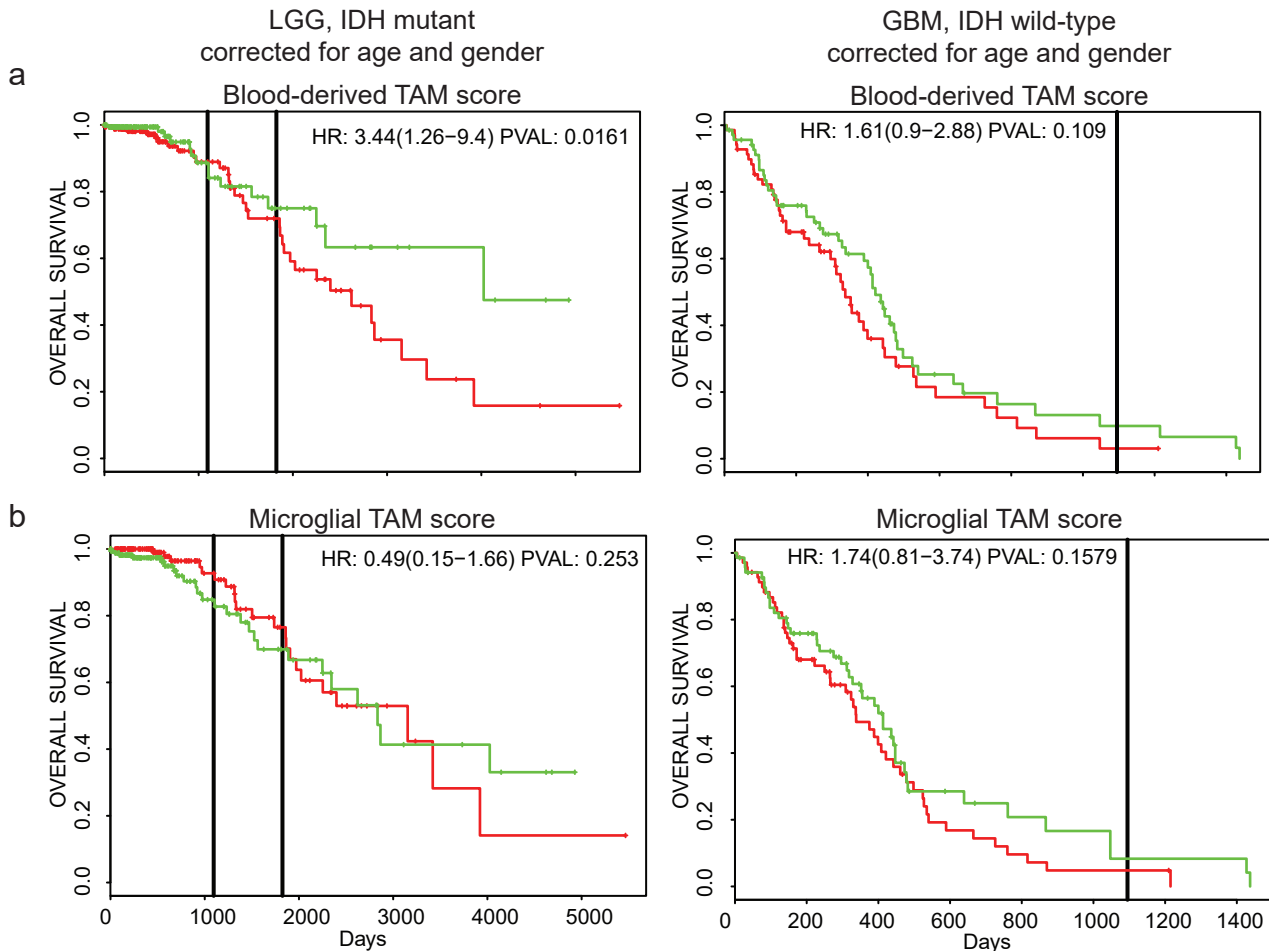

Figure S5

High signature expression

Low signature expression

SMART-Seq2 melanoma-derived TAMs (n=4 patients)

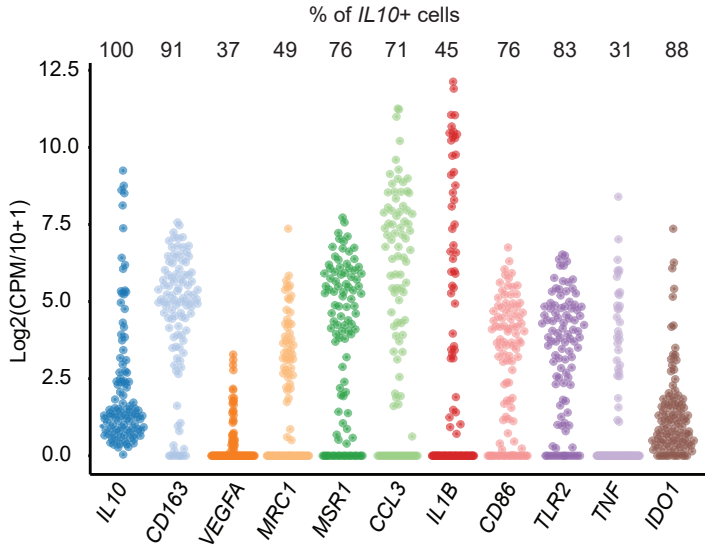

b

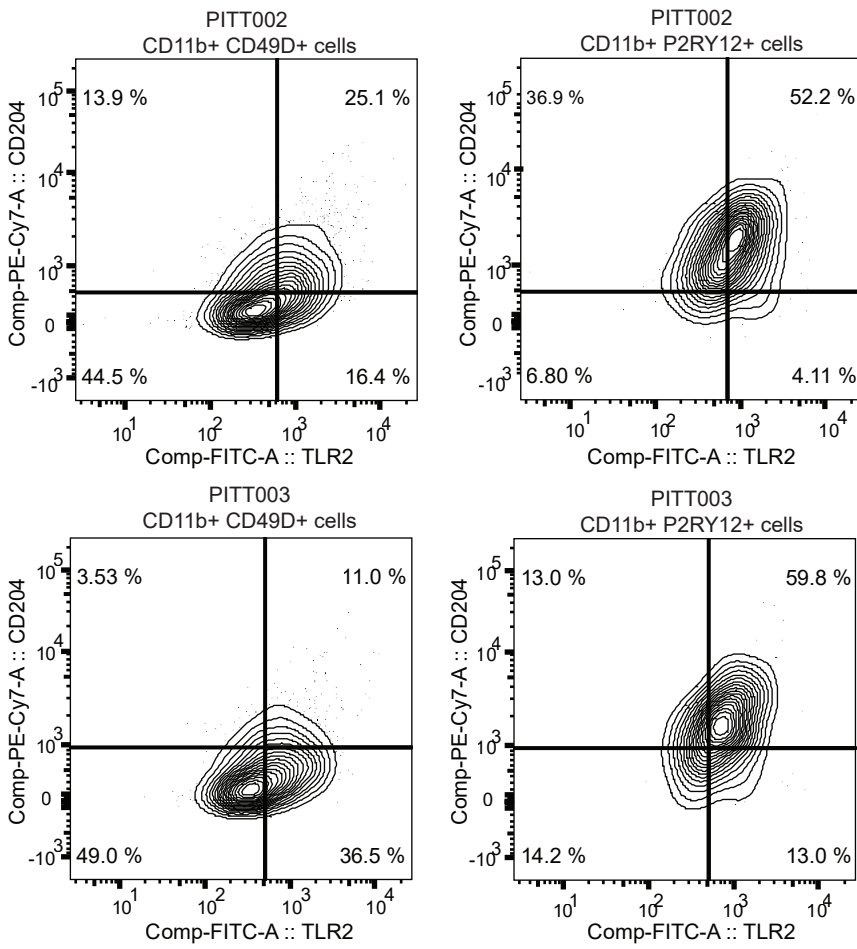

Supplement: 13059_2017_1362_MOESM2_ESM.pdf [file 13059_2017_1362_MOESM2_ESM.pdf]
